# Supplementary material for: TEAD4 Serves as a Prognostic Biomarker and Correlates With Immune Phenotype in Lower-Grade Gliomas
Source: Research Square preprint supplement (doi:10.21203/rs.3.rs-957415/v1), 2021-10-22
Supplement: Supplementary file 4 [file 71645ea2e7aa78ba142b80e9.xlsx]

## Sheet: Sheet1
	Top enriched GO terms and KEGG pathways
	Gene set name	NES	NOM p-value	FDR q-value
	KEGG_VIRAL_MYOCARDITIS	-2.20556	0	0.00114286
	KEGG_N_GLYCAN_BIOSYNTHESIS	-2.17853	0	0.00187334
	KEGG_ANTIGEN_PROCESSING_AND_PRESENTATION	-2.13641	0	0.00399086
	KEGG_AUTOIMMUNE_THYROID_DISEASE	-2.04003	0.00608519	0.0159977
	KEGG_INTESTINAL_IMMUNE_NETWORK_FOR_IGA_PRODUCTION	-2.0302	0	0.0144403
	GO_ANTIGEN_PROCESSING_AND_PRESENTATION	-2.27529	0	0.0281502
	GO_TUMOR_NECROSIS_FACTOR_MEDIATED_SIGNALING_PATHWAY	-2.25588	0	0.0178678
	GO_ANTIGEN_PROCESSING_AND_PRESENTATION_OF_PEPTIDE_ANTIGEN	-2.23295	0	0.0260707
	GO_LYMPHOCYTE_APOPTOTIC_PROCESS	-2.2133	0	0.0287421
	GO_RESPONSE_TO_TUMOR_NECROSIS_FACTOR	-2.21262	0	0.0232585
	NES:normalized enrichment score; NOM:nominal; FDR:false discovery rate
