# Supplementary material for: TEAD4 Serves as a Prognostic Biomarker and Correlates With Immune Phenotype in Lower-Grade Gliomas
Source: Research Square preprint supplement (doi:10.21203/rs.3.rs-957415/v1), 2021-10-22
Supplement: Supplementary file 5 [file 894c0684cd344d8a3648a8f5.xlsx]

## Sheet: Sheet1
	Clinicopathological Information
			CGGA			TCGA
			WHO II(%)	WHO III(%)		WHO II(%)	WHO III(%)
	Number
			185	255		257	270
	Gender
		Male	113(61%)	135(53%)		138(54%)	152(56%)
		Female	72(39%)	120(47%)		119(46%)	118(44%)
	Age
			39.25 ± 0.72	40.96 ± 0.66		39.92 ± 0.80	45.53 ± 0.81
	Progression Type
		Primary	135(73%)	144(56%)		248(96%)	265(98%)
		Recurrent	50(27%)	111(44%)		9(4%)	5(2%）
	IDH mutation
		Mutant	132(71%)	171(67%)		224(87%)	191(71%)
		Wildtype	37(20%)	59(23%)		30(12%)	78(29%)
		NA	16(9%)	25(10%)		3(1%)	1(0%)
	1p19q codeletion
		Codel	58(31%)	73(29%)		93(36%)	80(30%）
		Non-codel	112(61%)	161(63%)		162(63%)	189(70%)
		NA	15(8%)	21(8%)		2(1%)	1(0%)
	Median Survival Time
			1694	1133		821	609
	Censor
		Alive	120(65%)	104(41%)		217(84%)	177(66%)
		Dead	54(29%)	145(57%)		40(16%)	93(34%)
		NA	11(6%)	6(2%)		0(0%)	0(0%)
	NA:not avaliable
