# Supplementary material for: TEAD4 Serves as a Prognostic Biomarker and Correlates With Immune Phenotype in Lower-Grade Gliomas
Source: Research Square preprint supplement (doi:10.21203/rs.3.rs-957415/v1), 2021-10-22
Supplement: Supplementary file 6 [file 8d7a0332b793270e9813ffd6.xlsx]

## Sheet: Sheet1
	Univariate and multivariate Cox regression analyses
	Variable	Univariate Cox Regression		Multivariate Cox Regression
		HR (95% CI)	P value	HR (95% CI)	P value
	Age	1.1(1-1.1)	<0.001	1.059(1.044-1.07)	<0.001
	Gender	1.1(0.81-1.6)	0.445
	Grade	3.4(2.3-4.9)	<0.001	2.422(1.637-3.58)	<0.001
	Purity	0.018(0.0023-0.14)	<0.001	0.076(0.007-0.82)	0.034
	TEAD4	1.3(1.1-1.4)	<0.001	1.171(1.031-1.33)	0.015
