# Supplementary material for: TEAD4 Serves as a Prognostic Biomarker and Correlates With Immune Phenotype in Lower-Grade Gliomas
Source: Research Square preprint supplement (doi:10.21203/rs.3.rs-957415/v1), 2021-10-22
Supplement: Supplementary file 7 [file c825ecf9288c9f12d4704b88.xlsx]

## Sheet: Sheet1
TCGA clinical information
ID	Age	Gender	Grade	Histology	1p19q_codeletion_status	IDH_mutation_status	PRS_type	Censor	OS
TCGA-DB-A64R-01	24	FEMALE	WHO II	Oligodendroglioma	Codel	Mutant	Primary	0	955
TCGA-DU-7294-01	53	FEMALE	WHO II	Oligodendroglioma	Codel	Mutant	Primary	0	2869
TCGA-FG-A60K-01	34	FEMALE	WHO II	Oligoastrocytoma	Codel	Mutant	Primary	0	542
TCGA-P5-A735-01	38	FEMALE	WHO II	Astrocytoma	Codel	Mutant	Primary	0	292
TCGA-DB-A64Q-01	31	FEMALE	WHO II	Oligoastrocytoma	Codel	Mutant	Primary	0	182
TCGA-HT-7881-01	38	MALE	WHO II	Oligodendroglioma	Codel	Mutant	Primary	0	1079
TCGA-R8-A6MK-01	40	MALE	WHO II	Oligodendroglioma	Codel	Mutant	Primary	0	2702
TCGA-CS-6668-01	57	FEMALE	WHO II	Oligodendroglioma	Codel	Mutant	Primary	0	1519
TCGA-HT-7692-01	43	MALE	WHO II	Oligoastrocytoma	Codel	Mutant	Primary	0	90
TCGA-S9-A6UB-01	52	MALE	WHO II	Oligodendroglioma	Codel	Mutant	Primary	0	3761
TCGA-QH-A6CZ-01	38	MALE	WHO II	Oligoastrocytoma	Codel	Mutant	Primary	0	279
TCGA-HT-8010-01	64	FEMALE	WHO II	Oligodendroglioma	Codel	Mutant	Primary	0	50
TCGA-FG-8187-01	31	MALE	WHO II	Oligoastrocytoma	Codel	Mutant	Primary	0	611
TCGA-W9-A837-01	47	MALE	WHO II	Oligodendroglioma	Codel	Mutant	Primary	0	1553
TCGA-DB-5279-01	59	MALE	WHO II	Oligodendroglioma	Codel	Mutant	Primary	0	1354
TCGA-HW-7487-01	39	MALE	WHO II	Oligodendroglioma	Codel	Mutant	Primary	0	1382
TCGA-DB-A4XH-01	53	FEMALE	WHO II	Oligoastrocytoma	Codel	Mutant	Primary	0	962
TCGA-FG-7641-01	31	MALE	WHO II	Oligodendroglioma	Codel	Mutant	Primary	0	627
TCGA-DB-5278-01	17	MALE	WHO II	Oligodendroglioma	Codel	Mutant	Primary	0	2772
TCGA-S9-A7J1-01	43	MALE	WHO II	Oligodendroglioma	Codel	Mutant	Primary	0	249
TCGA-WY-A85A-01	20	MALE	WHO II	Astrocytoma	Codel	Mutant	Primary	0	1320
TCGA-S9-A6TY-01	50	MALE	WHO II	Oligodendroglioma	Codel	Mutant	Primary	0	1076
TCGA-P5-A77X-01	55	FEMALE	WHO II	Oligoastrocytoma	Codel	Mutant	Primary	0	105
TCGA-DU-8164-01	51	MALE	WHO II	Oligodendroglioma	Codel	Mutant	Primary	0	651
TCGA-DU-5870-01	34	FEMALE	WHO II	Oligodendroglioma	Codel	Mutant	Primary	0	5546
TCGA-S9-A6WH-01	73	FEMALE	WHO II	Oligoastrocytoma	Codel	Mutant	Primary	0	1173
TCGA-QH-A6X5-01	58	FEMALE	WHO II	Oligoastrocytoma	Codel	Mutant	Primary	0	497
TCGA-HW-7495-01	45	FEMALE	WHO II	Oligodendroglioma	Codel	Mutant	Primary	0	1078
TCGA-HT-7481-01	39	MALE	WHO II	Oligodendroglioma	Codel	Mutant	Primary	0	2918
TCGA-HT-A615-01	38	FEMALE	WHO II	Oligodendroglioma	Codel	Mutant	Primary	0	515
TCGA-HW-7491-01	35	MALE	WHO II	Oligodendroglioma	Codel	Mutant	Primary	0	2078
TCGA-HT-8558-01	29	FEMALE	WHO II	Oligodendroglioma	Codel	Mutant	Primary	0	418
TCGA-S9-A6U2-01	48	FEMALE	WHO II	Oligodendroglioma	Codel	Mutant	Primary	0	908
TCGA-QH-A86X-01	33	MALE	WHO II	Oligodendroglioma	Codel	Mutant	Primary	0	337
TCGA-DH-A7US-01	50	MALE	WHO II	Oligodendroglioma	Codel	Mutant	Primary	0	706
TCGA-S9-A7QY-01	35	FEMALE	WHO II	Oligoastrocytoma	Codel	Mutant	Primary	0	863
TCGA-FG-A713-01	74	FEMALE	WHO II	Oligoastrocytoma	Codel	Mutant	Primary	0	622
TCGA-HT-7875-01	56	MALE	WHO II	Oligodendroglioma	Codel	Mutant	Primary	0	10
TCGA-DH-A66F-01	49	MALE	WHO II	Oligodendroglioma	Codel	Mutant	Primary	0	523
TCGA-EZ-7264-01	47	FEMALE	WHO II	Oligodendroglioma	Codel	Mutant	Primary	0	1201
TCGA-F6-A8O3-01	34	MALE	WHO II	Oligodendroglioma	Codel	Mutant	Primary	0	7
TCGA-TQ-A7RJ-01	25	FEMALE	WHO II	Oligoastrocytoma	Codel	Mutant	Primary	0	1229
TCGA-HW-8322-01	39	MALE	WHO II	Oligodendroglioma	Codel	Mutant	Primary	0	758
TCGA-E1-A7Z2-01	58	FEMALE	WHO II	Oligodendroglioma	Codel	Mutant	Primary	1	398
TCGA-HT-7480-01	33	MALE	WHO II	Oligodendroglioma	Codel	Mutant	Primary	0	2287
TCGA-S9-A7R1-01	35	MALE	WHO II	Oligodendroglioma	Codel	Mutant	Primary	1	5166
TCGA-RY-A83X-01	46	FEMALE	WHO II	Oligodendroglioma	Codel	Mutant	Primary	0	939
TCGA-RY-A847-01	45	MALE	WHO II	Oligodendroglioma	Codel	Mutant	Primary	0	933
TCGA-R8-A73M-01	48	FEMALE	WHO II	Oligodendroglioma	Codel	Mutant	Primary	0	1806
TCGA-S9-A7QZ-01	41	MALE	WHO II	Oligodendroglioma	Codel	Mutant	Primary	0	826
TCGA-QH-A65Z-01	54	MALE	WHO II	Oligodendroglioma	Codel	Mutant	Primary	0	427
TCGA-TQ-A7RP-01	66	MALE	WHO II	Oligoastrocytoma	Codel	Mutant	Primary	0	914
TCGA-TM-A84R-01	46	MALE	WHO II	Oligodendroglioma	Codel	Mutant	Primary	0	566
TCGA-HT-7605-01	38	MALE	WHO II	Oligodendroglioma	Codel	Mutant	Primary	0	139
TCGA-HT-7695-01	29	FEMALE	WHO II	Oligodendroglioma	Codel	Mutant	Primary	0	442
TCGA-DU-A6S6-01	35	FEMALE	WHO II	Oligoastrocytoma	Codel	Mutant	Primary	0	2893
TCGA-TM-A7C5-01	30	MALE	WHO II	Oligoastrocytoma	Codel	Mutant	Primary	0	1500
TCGA-TQ-A7RU-01	51	MALE	WHO II	Oligodendroglioma	Codel	Mutant	Primary	0	1032
TCGA-DU-7009-01	32	FEMALE	WHO II	Oligodendroglioma	Codel	Mutant	Primary	1	4695
TCGA-P5-A5F0-01	33	MALE	WHO II	Oligodendroglioma	Codel	Mutant	Primary	0	287
TCGA-HT-7608-01	61	MALE	WHO II	Oligoastrocytoma	Codel	Mutant	Primary	0	671
TCGA-HT-7681-01	29	FEMALE	WHO II	Oligoastrocytoma	Codel	Mutant	Primary	0	1359
TCGA-R8-A6MO-01	53	FEMALE	WHO II	Oligodendroglioma	Codel	Mutant	Primary	0	993
TCGA-HW-7486-01	37	MALE	WHO II	Oligodendroglioma	Codel	Mutant	Primary	0	1721
TCGA-DB-A64L-01	67	FEMALE	WHO II	Oligodendroglioma	Codel	Mutant	Primary	0	736
TCGA-DU-5849-01	48	MALE	WHO II	Oligodendroglioma	Codel	Mutant	Primary	0	443
TCGA-DU-A6S2-01	37	FEMALE	WHO II	Oligodendroglioma	Codel	Mutant	Primary	0	777
TCGA-S9-A7IQ-01	45	FEMALE	WHO II	Oligoastrocytoma	Codel	Mutant	Primary	0	1099
TCGA-DU-A6S3-01	60	MALE	WHO II	Oligodendroglioma	Codel	Mutant	Primary	0	656
TCGA-S9-A6WE-01	34	MALE	WHO II	Oligodendroglioma	Codel	Mutant	Primary	0	4113
TCGA-HT-7877-01	20	FEMALE	WHO II	Oligodendroglioma	Codel	Mutant	Primary	0	4
TCGA-DB-A64U-01	38	FEMALE	WHO II	Oligoastrocytoma	Codel	Mutant	Primary	0	846
TCGA-FG-A6IZ-01	60	MALE	WHO II	Oligodendroglioma	Codel	Mutant	Primary	0	457
TCGA-HT-7607-01	61	FEMALE	WHO II	Astrocytoma	Codel	Mutant	Primary	1	96
TCGA-TQ-A7RO-01	29	MALE	WHO II	Oligoastrocytoma	Codel	Mutant	Primary	0	949
TCGA-DU-5874-01	62	FEMALE	WHO II	Oligodendroglioma	Codel	Mutant	Primary	0	461
TCGA-E1-5318-01	42	FEMALE	WHO II	Oligodendroglioma	Codel	Mutant	Primary	1	2379
TCGA-HT-8012-01	30	FEMALE	WHO II	Oligodendroglioma	Codel	Mutant	Primary	0	286
TCGA-E1-5319-01	48	FEMALE	WHO II	Oligodendroglioma	Codel	Mutant	Primary	1	2907
TCGA-HT-7467-01	54	MALE	WHO II	Oligodendroglioma	Codel	Mutant	Primary	0	3
TCGA-DU-5870-02	34	FEMALE	WHO II	Oligodendroglioma	Codel	Mutant	Recurrent	0	5546
TCGA-TQ-A7RG-01	36	MALE	WHO II	Oligoastrocytoma	Codel	Mutant	Primary	0	599
TCGA-DU-6400-01	66	FEMALE	WHO II	Oligodendroglioma	Codel	Mutant	Primary	1	37
TCGA-DB-A4XA-01	30	MALE	WHO II	Oligoastrocytoma	Codel	Mutant	Primary	0	573
TCGA-WY-A85E-01	48	FEMALE	WHO II	Oligoastrocytoma	Codel	Mutant	Primary	0	633
TCGA-FG-A6J1-01	44	FEMALE	WHO II	Oligodendroglioma	Codel	Mutant	Primary	0	500
TCGA-S9-A6U5-01	33	MALE	WHO II	Astrocytoma	Codel	Mutant	Primary	0	992
TCGA-FG-5964-01	62	MALE	WHO II	Oligodendroglioma	Codel	Mutant	Primary	0	1588
TCGA-VM-A8CE-01	25	MALE	WHO II	Oligodendroglioma	Codel	Mutant	Primary	0	1191
TCGA-DB-A64V-01	54	MALE	WHO II	Oligodendroglioma	Codel	Mutant	Primary	0	889
TCGA-FG-A710-01	50	FEMALE	WHO II	Oligodendroglioma	Codel	Mutant	Primary	0	1115
TCGA-QH-A65V-01	43	FEMALE	WHO II	Oligodendroglioma	Codel	Mutant	Primary	0	384
TCGA-FG-7634-01	28	MALE	WHO II	Oligodendroglioma	Codel	Mutant	Primary	0	467
TCGA-HT-7485-01	42	MALE	WHO II	Astrocytoma	Non-codel	Mutant	Primary	0	122
TCGA-DB-A4X9-01	33	FEMALE	WHO II	Oligoastrocytoma	Non-codel	Mutant	Primary	0	1412
TCGA-CS-4938-01	31	FEMALE	WHO II	Astrocytoma	Non-codel	Mutant	Primary	0	3574
TCGA-TM-A7CF-02	41	FEMALE	WHO II	Astrocytoma	Non-codel	Mutant	Recurrent	0	1989
TCGA-HT-A614-01	47	MALE	WHO II	Oligoastrocytoma	Non-codel	Mutant	Primary	0	82
TCGA-VM-A8C8-01	50	FEMALE	WHO II	Oligodendroglioma	Non-codel	Mutant	Primary	0	1397
TCGA-FG-6691-01	23	FEMALE	WHO II	Astrocytoma	Non-codel	Mutant	Primary	0	1257
TCGA-TM-A7CF-01	41	FEMALE	WHO II	Astrocytoma	Non-codel	Mutant	Primary	0	1989
TCGA-QH-A6X9-01	73	FEMALE	WHO II	Oligodendroglioma	Non-codel	Mutant	Primary	0	58
TCGA-F6-A8O4-01	44	MALE	WHO II	Astrocytoma	Non-codel	Mutant	Primary	0	6
TCGA-HT-7610-01	25	FEMALE	WHO II	Oligoastrocytoma	Non-codel	Mutant	Primary	0	1706
TCGA-QH-A6X3-01	27	MALE	WHO II	Oligoastrocytoma	Non-codel	Mutant	Primary	0	313
TCGA-E1-A7Z6-01	41	FEMALE	WHO II	Astrocytoma	Non-codel	Mutant	Primary	1	984
TCGA-FG-8189-01	33	FEMALE	WHO II	Oligodendroglioma	Non-codel	Mutant	Primary	0	685
TCGA-E1-A7Z4-01	35	MALE	WHO II	Astrocytoma	Non-codel	Mutant	Primary	1	4412
TCGA-HT-8108-01	26	FEMALE	WHO II	Oligodendroglioma	Non-codel	Mutant	Primary	0	76
TCGA-HT-7884-01	44	FEMALE	WHO II	Astrocytoma	Non-codel	Mutant	Primary	0	343
TCGA-TM-A7CA-01	44	MALE	WHO II	Astrocytoma	Non-codel	Mutant	Primary	0	1058
TCGA-HT-7676-01	26	MALE	WHO II	Oligodendroglioma	Non-codel	Mutant	Primary	0	5
TCGA-HT-7603-01	29	MALE	WHO II	Oligodendroglioma	Non-codel	Mutant	Primary	0	705
TCGA-HT-7858-01	28	MALE	WHO II	Astrocytoma	Non-codel	Mutant	Primary	0	1540
TCGA-S9-A7R3-01	28	FEMALE	WHO II	Astrocytoma	Non-codel	Mutant	Primary	0	3013
TCGA-DU-6407-01	35	FEMALE	WHO II	Oligodendroglioma	Non-codel	Mutant	Primary	1	2875
TCGA-HT-8113-01	49	FEMALE	WHO II	Oligodendroglioma	Non-codel	Mutant	Primary	0	900
TCGA-HW-A5KL-01	42	FEMALE	WHO II	Astrocytoma	Non-codel	Mutant	Primary	0	878
TCGA-FG-A4MT-01	27	FEMALE	WHO II	Oligodendroglioma	Non-codel	Mutant	Primary	0	1164
TCGA-P5-A5EV-01	39	MALE	WHO II	Astrocytoma	Non-codel	Mutant	Primary	0	7
TCGA-HT-A61A-01	20	FEMALE	WHO II	Oligodendroglioma	Non-codel	Mutant	Primary	0	194
TCGA-HT-7474-01	52	MALE	WHO II	Oligoastrocytoma	Non-codel	Mutant	Primary	0	114
TCGA-P5-A5F1-01	30	MALE	WHO II	Astrocytoma	Non-codel	Mutant	Primary	0	179
TCGA-TQ-A7RW-01	32	MALE	WHO II	Oligodendroglioma	Non-codel	Mutant	Primary	1	821
TCGA-S9-A6WO-01	29	MALE	WHO II	Astrocytoma	Non-codel	Mutant	Primary	0	566
TCGA-HT-7602-01	21	MALE	WHO II	Oligodendroglioma	Non-codel	Mutant	Primary	0	908
TCGA-QH-A6XA-01	23	FEMALE	WHO II	Oligoastrocytoma	Non-codel	Mutant	Primary	0	502
TCGA-DB-5280-01	43	MALE	WHO II	Oligoastrocytoma	Non-codel	Mutant	Primary	0	1112
TCGA-P5-A5EW-01	20	FEMALE	WHO II	Astrocytoma	Non-codel	Mutant	Primary	0	204
TCGA-FG-8182-01	35	MALE	WHO II	Oligodendroglioma	Non-codel	Mutant	Primary	0	416
TCGA-HT-A5RB-01	24	MALE	WHO II	Astrocytoma	Non-codel	Mutant	Primary	0	3
TCGA-HT-7880-01	30	MALE	WHO II	Oligoastrocytoma	Non-codel	Mutant	Primary	0	162
TCGA-HT-A616-01	36	FEMALE	WHO II	Astrocytoma	Non-codel	Mutant	Primary	0	55
TCGA-DU-5853-01	29	MALE	WHO II	Oligoastrocytoma	Non-codel	Mutant	Primary	0	407
TCGA-TM-A84T-01	19	MALE	WHO II	Oligoastrocytoma	Non-codel	Mutant	Primary	0	724
TCGA-DU-8166-01	29	FEMALE	WHO II	Oligoastrocytoma	Non-codel	Mutant	Primary	0	516
TCGA-FG-A711-01	33	FEMALE	WHO II	Oligodendroglioma	Non-codel	Mutant	Primary	1	1481
TCGA-FG-6690-01	70	MALE	WHO II	Oligodendroglioma	Non-codel	Mutant	Primary	0	1294
TCGA-FG-A60J-01	47	FEMALE	WHO II	Oligoastrocytoma	Non-codel	Mutant	Primary	0	449
TCGA-HT-7873-01	29	MALE	WHO II	Oligoastrocytoma	Non-codel	Mutant	Primary	0	718
TCGA-S9-A6WI-01	56	FEMALE	WHO II	Oligoastrocytoma	Non-codel	Mutant	Primary	0	2585
TCGA-TM-A7C4-01	39	FEMALE	WHO II	Astrocytoma	Non-codel	Mutant	Primary	0	1470
TCGA-FG-A4MT-02	27	FEMALE	WHO II	Oligodendroglioma	Non-codel	Mutant	Recurrent	0	1164
TCGA-DU-A7TC-01	32	MALE	WHO II	Astrocytoma	Non-codel	Mutant	Primary	0	1137
TCGA-S9-A6U8-01	24	MALE	WHO II	Astrocytoma	Non-codel	Mutant	Primary	1	2988
TCGA-P5-A5F2-01	36	FEMALE	WHO II	Astrocytoma	Non-codel	Mutant	Primary	0	242
TCGA-DU-7008-01	41	FEMALE	WHO II	Oligodendroglioma	Non-codel	Mutant	Primary	0	4752
TCGA-S9-A6TZ-01	39	FEMALE	WHO II	Astrocytoma	Non-codel	Mutant	Primary	0	1120
TCGA-HT-7482-01	18	FEMALE	WHO II	Oligoastrocytoma	Non-codel	Mutant	Primary	0	3253
TCGA-FG-5965-02	39	FEMALE	WHO II	Oligoastrocytoma	Non-codel	Mutant	Recurrent	1	1120
TCGA-FG-8188-01	41	MALE	WHO II	Oligoastrocytoma	Non-codel	Mutant	Primary	0	455
TCGA-WH-A86K-01	65	MALE	WHO II	Astrocytoma	Non-codel	Mutant	Primary	0	405
TCGA-FG-A70Y-01	20	FEMALE	WHO II	Oligodendroglioma	Non-codel	Mutant	Primary	0	868
TCGA-HW-7489-01	38	MALE	WHO II	Oligoastrocytoma	Non-codel	Mutant	Primary	1	1262
TCGA-FG-7637-01	49	MALE	WHO II	Oligoastrocytoma	Non-codel	Mutant	Primary	0	1219
TCGA-QH-A65S-01	32	FEMALE	WHO II	Oligoastrocytoma	Non-codel	Mutant	Primary	0	77
TCGA-HT-7483-01	14	MALE	WHO II	Oligoastrocytoma	Non-codel	Mutant	Primary	0	5255
TCGA-DU-5871-01	37	FEMALE	WHO II	Oligoastrocytoma	Non-codel	Mutant	Primary	0	576
TCGA-E1-A7YY-01	27	FEMALE	WHO II	Oligodendroglioma	Non-codel	Mutant	Primary	1	4445
TCGA-HT-A74J-01	33	MALE	WHO II	Oligoastrocytoma	Non-codel	Mutant	Primary	0	320
TCGA-HT-7606-01	30	FEMALE	WHO II	Astrocytoma	Non-codel	Mutant	Primary	0	526
TCGA-HT-7689-01	58	FEMALE	WHO II	Oligodendroglioma	Non-codel	Mutant	Primary	0	455
TCGA-DU-A76O-01	30	MALE	WHO II	Astrocytoma	Non-codel	Mutant	Primary	0	522
TCGA-DU-7015-01	41	FEMALE	WHO II	Oligodendroglioma	Non-codel	Mutant	Primary	0	2761
TCGA-E1-5322-01	38	FEMALE	WHO II	Oligoastrocytoma	Non-codel	Mutant	Primary	1	3978
TCGA-DU-A7TG-01	40	MALE	WHO II	Oligodendroglioma	Non-codel	Mutant	Primary	1	1351
TCGA-P5-A733-01	52	FEMALE	WHO II	Astrocytoma	Non-codel	Mutant	Primary	0	414
TCGA-CS-4944-01	50	MALE	WHO II	Astrocytoma	Non-codel	Mutant	Primary	0	1828
TCGA-FG-6689-01	30	MALE	WHO II	Astrocytoma	Non-codel	Mutant	Primary	0	454
TCGA-CS-6667-01	39	FEMALE	WHO II	Astrocytoma	Non-codel	Mutant	Primary	0	1469
TCGA-DB-A64S-01	20	MALE	WHO II	Oligoastrocytoma	Non-codel	Mutant	Primary	0	835
TCGA-DB-A75M-01	47	MALE	WHO II	Astrocytoma	Non-codel	Mutant	Primary	0	544
TCGA-DU-7011-01	25	MALE	WHO II	Oligoastrocytoma	Non-codel	Mutant	Primary	1	3200
TCGA-FG-A4MX-01	47	MALE	WHO II	Astrocytoma	Non-codel	Mutant	Primary	0	569
TCGA-DU-5872-01	43	FEMALE	WHO II	Oligoastrocytoma	Non-codel	Mutant	Primary	0	532
TCGA-DU-6399-01	54	MALE	WHO II	Oligodendroglioma	Non-codel	Mutant	Primary	1	2000
TCGA-IK-7675-01	43	MALE	WHO II	Oligodendroglioma	Non-codel	Mutant	Primary	1	578
TCGA-HT-7902-01	30	FEMALE	WHO II	Oligoastrocytoma	Non-codel	Mutant	Primary	0	956
TCGA-S9-A6TU-01	38	MALE	WHO II	Astrocytoma	Non-codel	Mutant	Primary	0	2650
TCGA-HT-7693-01	51	FEMALE	WHO II	Oligodendroglioma	Non-codel	Mutant	Primary	0	533
TCGA-VM-A8CA-01	54	MALE	WHO II	Oligodendroglioma	Non-codel	Mutant	Primary	0	411
TCGA-RY-A83Y-01	45	MALE	WHO II	Oligodendroglioma	Non-codel	Mutant	Primary	0	166
TCGA-TQ-A7RK-01	29	MALE	WHO II	Oligoastrocytoma	Non-codel	Mutant	Primary	0	1341
TCGA-DB-A4XC-01	26	MALE	WHO II	Oligoastrocytoma	Non-codel	Mutant	Primary	0	1421
TCGA-P5-A731-01	59	FEMALE	WHO II	Oligoastrocytoma	Non-codel	Mutant	Primary	0	274
TCGA-WY-A85B-01	24	MALE	WHO II	Astrocytoma	Non-codel	Mutant	Primary	0	1393
TCGA-DU-6395-01	31	MALE	WHO II	Oligoastrocytoma	Non-codel	Mutant	Primary	1	1491
TCGA-TM-A84L-01	31	MALE	WHO II	Oligoastrocytoma	Non-codel	Mutant	Primary	1	1242
TCGA-VM-A8CH-01	24	FEMALE	WHO II	Astrocytoma	Non-codel	Mutant	Primary	0	714
TCGA-TQ-A8XE-02	42	FEMALE	WHO II	Oligodendroglioma	Non-codel	Mutant	Recurrent	1	954
TCGA-DU-A7TA-01	32	MALE	WHO II	Oligodendroglioma	Non-codel	Mutant	Primary	0	2565
TCGA-HT-7476-01	26	MALE	WHO II	Astrocytoma	Non-codel	Mutant	Primary	0	199
TCGA-TQ-A7RR-01	38	MALE	WHO II	Oligoastrocytoma	Non-codel	Mutant	Primary	0	787
TCGA-HW-A5KM-01	35	MALE	WHO II	Astrocytoma	Non-codel	Mutant	Primary	0	630
TCGA-HW-7490-01	41	MALE	WHO II	Astrocytoma	Non-codel	Mutant	Primary	0	1387
TCGA-DU-6401-01	31	FEMALE	WHO II	Oligodendroglioma	Non-codel	Mutant	Primary	1	2660
TCGA-HT-A5R5-01	33	FEMALE	WHO II	Oligodendroglioma	Non-codel	Mutant	Primary	0	4
TCGA-DU-A5TS-01	42	MALE	WHO II	Oligodendroglioma	Non-codel	Mutant	Primary	0	964
TCGA-HT-7611-01	36	MALE	WHO II	Oligoastrocytoma	Non-codel	Mutant	Primary	0	1752
TCGA-DU-7306-01	67	MALE	WHO II	Oligoastrocytoma	Non-codel	Mutant	Primary	0	1277
TCGA-HT-7473-01	28	MALE	WHO II	Oligoastrocytoma	Non-codel	Mutant	Primary	0	503
TCGA-TQ-A7RK-02	29	MALE	WHO II	Oligoastrocytoma	Non-codel	Mutant	Recurrent	0	1341
TCGA-E1-A7Z3-01	31	FEMALE	WHO II	Astrocytoma	Non-codel	Mutant	Primary	1	2235
TCGA-S9-A6WQ-01	57	FEMALE	WHO II	Oligoastrocytoma	Non-codel	Mutant	Primary	0	428
TCGA-E1-A7YW-01	28	MALE	WHO II	Oligoastrocytoma	Non-codel	Mutant	Primary	1	1120
TCGA-HT-8018-01	40	FEMALE	WHO II	Oligoastrocytoma	Non-codel	Mutant	Primary	1	1152
TCGA-FG-5965-01	39	FEMALE	WHO II	Oligoastrocytoma	Non-codel	Mutant	Primary	1	1120
TCGA-DU-7301-01	53	MALE	WHO II	Oligodendroglioma	Non-codel	Mutant	Primary	1	788
TCGA-HT-7604-01	50	MALE	WHO II	Astrocytoma	Non-codel	Mutant	Primary	0	3725
TCGA-DU-8167-01	69	FEMALE	WHO II	Oligoastrocytoma	Non-codel	Mutant	Primary	0	471
TCGA-HT-8013-01	37	FEMALE	WHO II	Oligoastrocytoma	Non-codel	Mutant	Primary	1	1933
TCGA-FG-A60L-01	34	FEMALE	WHO II	Astrocytoma	Non-codel	Mutant	Primary	0	655
TCGA-FG-A4MY-01	44	FEMALE	WHO II	Oligoastrocytoma	Non-codel	Mutant	Primary	0	721
TCGA-DU-5872-02	43	FEMALE	WHO II	Oligoastrocytoma	Non-codel	Mutant	Recurrent	0	532
TCGA-DU-6407-02	35	FEMALE	WHO II	Oligodendroglioma	Non-codel	Mutant	Recurrent	1	2875
TCGA-DU-A5TR-01	51	MALE	WHO II	Oligoastrocytoma	Non-codel	Mutant	Primary	0	908
TCGA-TM-A84Q-01	31	MALE	WHO II	Astrocytoma	Non-codel	Mutant	Primary	0	772
TCGA-HT-7478-01	36	MALE	WHO II	Astrocytoma	Non-codel	Mutant	Primary	0	194
TCGA-S9-A7R7-01	27	MALE	WHO II	Astrocytoma	Non-codel	Mutant	Primary	0	3000
TCGA-DU-A5TU-01	62	FEMALE	WHO II	Astrocytoma	Non-codel	Mutant	Primary	0	796
TCGA-DU-7007-01	33	MALE	WHO II	Astrocytoma	Non-codel	Mutant	Primary	1	1915
TCGA-HT-7472-01	38	MALE	WHO II	Oligodendroglioma	Non-codel	Mutant	Primary	0	1
TCGA-QH-A6CX-01	66	MALE	WHO II	Astrocytoma	Non-codel	Mutant	Primary	1	372
TCGA-DU-7014-01	59	MALE	WHO II	Oligodendroglioma	Non-codel	Mutant	Primary	1	3571
TCGA-TQ-A8XE-01	42	FEMALE	WHO II	Oligodendroglioma	NA	NA	Primary	1	954
TCGA-TQ-A7RS-01	25	FEMALE	WHO II	Oligodendroglioma	NA	NA	Primary	0	0
TCGA-HW-7493-01	40	FEMALE	WHO II	Astrocytoma	Non-codel	NA	Primary	0	2107
TCGA-CS-6669-01	26	FEMALE	WHO II	Oligodendroglioma	Non-codel	Wildtype	Primary	0	1494
TCGA-WY-A85D-01	60	MALE	WHO II	Oligoastrocytoma	Non-codel	Wildtype	Primary	0	1147
TCGA-HT-7680-01	32	FEMALE	WHO II	Astrocytoma	Non-codel	Wildtype	Primary	0	23
TCGA-HT-8015-01	21	MALE	WHO II	Astrocytoma	Non-codel	Wildtype	Primary	0	3
TCGA-DU-A7TB-01	56	MALE	WHO II	Oligodendroglioma	Non-codel	Wildtype	Primary	0	1567
TCGA-TQ-A7RQ-01	38	FEMALE	WHO II	Oligodendroglioma	Non-codel	Wildtype	Primary	0	795
TCGA-P5-A5ET-01	27	MALE	WHO II	Oligodendroglioma	Non-codel	Wildtype	Primary	0	0
TCGA-TQ-A7RN-01	32	MALE	WHO II	Oligodendroglioma	Non-codel	Wildtype	Primary	0	1026
TCGA-TQ-A7RI-01	37	FEMALE	WHO II	Oligodendroglioma	Non-codel	Wildtype	Primary	0	62
TCGA-HT-A617-01	47	MALE	WHO II	Oligodendroglioma	Non-codel	Wildtype	Primary	0	491
TCGA-TQ-A7RV-01	27	MALE	WHO II	Astrocytoma	Non-codel	Wildtype	Primary	0	1868
TCGA-RY-A845-01	40	FEMALE	WHO II	Oligoastrocytoma	Non-codel	Wildtype	Primary	0	596
TCGA-TQ-A7RV-02	27	MALE	WHO II	Astrocytoma	Non-codel	Wildtype	Recurrent	0	1868
TCGA-P5-A737-01	47	MALE	WHO II	Oligoastrocytoma	Non-codel	Wildtype	Primary	0	372
TCGA-DB-A64O-01	59	MALE	WHO II	Oligoastrocytoma	Non-codel	Wildtype	Primary	1	775
TCGA-CS-5395-01	43	MALE	WHO II	Oligodendroglioma	Non-codel	Wildtype	Primary	1	639
TCGA-DU-A76K-01	87	MALE	WHO II	Oligodendroglioma	Non-codel	Wildtype	Primary	1	347
TCGA-P5-A5EY-01	21	MALE	WHO II	Astrocytoma	Non-codel	Wildtype	Primary	0	72
TCGA-HT-A74L-01	22	FEMALE	WHO II	Oligoastrocytoma	Non-codel	Wildtype	Primary	0	336
TCGA-FG-7643-01	49	FEMALE	WHO II	Oligoastrocytoma	Non-codel	Wildtype	Primary	0	611
TCGA-WY-A859-01	34	FEMALE	WHO II	Astrocytoma	Non-codel	Wildtype	Primary	0	1213
TCGA-HT-7854-01	62	MALE	WHO II	Astrocytoma	Non-codel	Wildtype	Primary	0	1201
TCGA-HT-7691-01	31	FEMALE	WHO II	Astrocytoma	Non-codel	Wildtype	Primary	0	3
TCGA-TQ-A7RH-01	39	MALE	WHO II	Oligoastrocytoma	Non-codel	Wildtype	Primary	0	486
TCGA-DB-A75P-01	25	FEMALE	WHO II	Astrocytoma	Non-codel	Wildtype	Primary	0	492
TCGA-WY-A85C-01	36	MALE	WHO II	Astrocytoma	Non-codel	Wildtype	Primary	0	1426
TCGA-HT-8107-01	62	MALE	WHO II	Oligodendroglioma	Non-codel	Wildtype	Primary	0	14
TCGA-P5-A5F6-01	26	MALE	WHO II	Oligodendroglioma	Non-codel	Wildtype	Primary	0	39
TCGA-VM-A8C9-01	37	FEMALE	WHO II	Astrocytoma	Non-codel	Wildtype	Primary	0	1314
TCGA-TM-A84C-01	32	MALE	WHO II	Astrocytoma	Non-codel	Wildtype	Primary	1	492
TCGA-QH-A6X4-01	47	MALE	WHO III	Oligoastrocytoma	Codel	Mutant	Primary	0	442
TCGA-VM-A8CB-01	33	MALE	WHO III	Oligodendroglioma	Codel	Mutant	Primary	0	3
TCGA-QH-A6CY-01	38	MALE	WHO III	Oligoastrocytoma	Codel	Mutant	Primary	0	408
TCGA-DB-A64W-01	65	FEMALE	WHO III	Oligoastrocytoma	Codel	Mutant	Primary	1	438
TCGA-S9-A6WD-01	58	MALE	WHO III	Oligodendroglioma	Codel	Mutant	Primary	0	2289
TCGA-TM-A84M-01	40	MALE	WHO III	Oligodendroglioma	Codel	Mutant	Primary	0	754
TCGA-DU-7018-01	57	FEMALE	WHO III	Oligodendroglioma	Codel	Mutant	Primary	1	933
TCGA-VM-A8CF-01	44	FEMALE	WHO III	Astrocytoma	Codel	Mutant	Primary	0	609
TCGA-DU-8168-01	55	FEMALE	WHO III	Oligodendroglioma	Codel	Mutant	Primary	0	431
TCGA-HT-7687-01	74	MALE	WHO III	Oligodendroglioma	Codel	Mutant	Primary	0	3
TCGA-TQ-A7RF-01	27	FEMALE	WHO III	Oligodendroglioma	Codel	Mutant	Primary	0	650
TCGA-DU-A6S8-01	74	FEMALE	WHO III	Oligodendroglioma	Codel	Mutant	Primary	0	678
TCGA-HT-A4DV-01	51	FEMALE	WHO III	Oligodendroglioma	Codel	Mutant	Primary	0	792
TCGA-DU-7302-01	48	FEMALE	WHO III	Oligodendroglioma	Codel	Mutant	Primary	0	1834
TCGA-HT-7694-01	60	MALE	WHO III	Oligodendroglioma	Codel	Mutant	Primary	0	210
TCGA-S9-A7J2-01	25	MALE	WHO III	Oligodendroglioma	Codel	Mutant	Primary	0	62
TCGA-P5-A72Z-01	64	FEMALE	WHO III	Oligodendroglioma	Codel	Mutant	Primary	0	354
TCGA-HT-7874-01	41	FEMALE	WHO III	Oligodendroglioma	Codel	Mutant	Primary	0	1130
TCGA-HT-7468-01	30	MALE	WHO III	Oligodendroglioma	Codel	Mutant	Primary	0	203
TCGA-FG-5962-01	54	MALE	WHO III	Oligodendroglioma	Codel	Mutant	Primary	0	1453
TCGA-TM-A84G-01	54	FEMALE	WHO III	Oligodendroglioma	Codel	Mutant	Primary	0	1236
TCGA-HT-7856-01	35	MALE	WHO III	Oligodendroglioma	Codel	Mutant	Primary	0	1189
TCGA-QH-A65R-01	38	FEMALE	WHO III	Oligodendroglioma	Codel	Mutant	Primary	0	461
TCGA-HT-8109-01	64	MALE	WHO III	Oligodendroglioma	Codel	Mutant	Primary	0	169
TCGA-R8-A6ML-01	52	MALE	WHO III	Oligodendroglioma	Codel	Mutant	Primary	0	2860
TCGA-FG-7638-01	31	FEMALE	WHO III	Oligodendroglioma	Codel	Mutant	Primary	0	686
TCGA-DH-A669-01	70	MALE	WHO III	Oligodendroglioma	Codel	Mutant	Primary	1	919
TCGA-DB-A4XG-01	34	MALE	WHO III	Oligodendroglioma	Codel	Mutant	Primary	0	2219
TCGA-DU-6410-01	56	MALE	WHO III	Oligodendroglioma	Codel	Mutant	Primary	0	242
TCGA-HT-A619-01	51	FEMALE	WHO III	Oligodendroglioma	Codel	Mutant	Primary	0	651
TCGA-IK-8125-01	62	MALE	WHO III	Oligoastrocytoma	Codel	Mutant	Primary	0	1301
TCGA-E1-A7YD-01	57	MALE	WHO III	Astrocytoma	Codel	Mutant	Primary	1	435
TCGA-HT-7620-01	40	MALE	WHO III	Oligodendroglioma	Codel	Mutant	Primary	0	434
TCGA-RY-A843-01	30	MALE	WHO III	Astrocytoma	Codel	Mutant	Primary	0	63
TCGA-DH-5144-01	56	FEMALE	WHO III	Oligodendroglioma	Codel	Mutant	Primary	0	748
TCGA-CS-5396-01	53	FEMALE	WHO III	Oligodendroglioma	Codel	Mutant	Primary	0	1631
TCGA-DU-A76R-01	51	MALE	WHO III	Oligodendroglioma	Codel	Mutant	Primary	1	648
TCGA-DU-6397-01	45	MALE	WHO III	Oligodendroglioma	Codel	Mutant	Primary	1	1401
TCGA-S9-A6TX-01	46	MALE	WHO III	Oligodendroglioma	Codel	Mutant	Primary	0	1245
TCGA-FG-8186-01	42	FEMALE	WHO III	Oligoastrocytoma	Codel	Mutant	Primary	0	487
TCGA-VV-A829-01	44	MALE	WHO III	Oligoastrocytoma	Codel	Mutant	Primary	0	1127
TCGA-TM-A84S-01	36	MALE	WHO III	Oligodendroglioma	Codel	Mutant	Primary	0	454
TCGA-E1-5311-01	31	MALE	WHO III	Oligodendroglioma	Codel	Mutant	Primary	1	4084
TCGA-KT-A74X-01	26	MALE	WHO III	Oligoastrocytoma	Codel	Mutant	Primary	0	438
TCGA-HT-7677-01	53	MALE	WHO III	Oligodendroglioma	Codel	Mutant	Primary	0	494
TCGA-DU-7300-01	53	FEMALE	WHO III	Oligodendroglioma	Codel	Mutant	Primary	1	1886
TCGA-S9-A7IY-01	39	MALE	WHO III	Oligoastrocytoma	Codel	Mutant	Primary	0	715
TCGA-DU-6393-01	66	MALE	WHO III	Oligodendroglioma	Codel	Mutant	Primary	1	1585
TCGA-HT-A5R9-01	48	FEMALE	WHO III	Oligodendroglioma	Codel	Mutant	Primary	0	2
TCGA-S9-A6WP-01	42	MALE	WHO III	Oligoastrocytoma	Codel	Mutant	Primary	0	567
TCGA-HW-A5KJ-01	68	MALE	WHO III	Oligodendroglioma	Codel	Mutant	Primary	1	962
TCGA-S9-A7J3-01	52	FEMALE	WHO III	Oligodendroglioma	Codel	Mutant	Primary	0	629
TCGA-HT-8105-01	54	MALE	WHO III	Oligodendroglioma	Codel	Mutant	Primary	0	190
TCGA-CS-6670-01	43	MALE	WHO III	Oligodendroglioma	Codel	Mutant	Primary	0	1426
TCGA-TM-A84O-01	61	FEMALE	WHO III	Oligodendroglioma	Codel	Mutant	Primary	1	1011
TCGA-S9-A6WL-01	52	MALE	WHO III	Astrocytoma	Codel	Mutant	Primary	0	946
TCGA-QH-A6X8-01	56	FEMALE	WHO III	Oligodendroglioma	Codel	Mutant	Primary	0	509
TCGA-DH-A7UR-01	59	FEMALE	WHO III	Oligodendroglioma	Codel	Mutant	Primary	0	1650
TCGA-S9-A6TW-01	40	MALE	WHO III	Oligodendroglioma	Codel	Mutant	Primary	0	1250
TCGA-DH-5141-01	32	MALE	WHO III	Oligodendroglioma	Codel	Mutant	Primary	0	968
TCGA-DU-A7T6-01	73	FEMALE	WHO III	Oligodendroglioma	Codel	Mutant	Primary	1	547
TCGA-DB-5274-01	37	FEMALE	WHO III	Oligoastrocytoma	Codel	Mutant	Primary	0	2289
TCGA-E1-A7YO-01	45	MALE	WHO III	Oligodendroglioma	Codel	Mutant	Primary	1	2282
TCGA-VW-A7QS-01	35	FEMALE	WHO III	Oligodendroglioma	Codel	Mutant	Primary	0	706
TCGA-QH-A65X-01	28	FEMALE	WHO III	Oligoastrocytoma	Codel	Mutant	Primary	0	482
TCGA-DU-6397-02	45	MALE	WHO III	Oligodendroglioma	Codel	Mutant	Recurrent	1	1401
TCGA-HT-7471-01	37	FEMALE	WHO III	Oligodendroglioma	Codel	Mutant	Primary	0	4
TCGA-HT-7616-01	75	MALE	WHO III	Oligodendroglioma	Codel	Mutant	Primary	1	7
TCGA-DU-A7TI-01	32	MALE	WHO III	Astrocytoma	Codel	Mutant	Primary	1	1183
TCGA-E1-A7YH-01	47	FEMALE	WHO III	Astrocytoma	Codel	Mutant	Primary	1	2835
TCGA-DH-A669-02	70	MALE	WHO III	Oligodendroglioma	Codel	Mutant	Recurrent	1	919
TCGA-E1-A7YQ-01	58	FEMALE	WHO III	Oligodendroglioma	Codel	Mutant	Primary	1	1578
TCGA-DB-A64P-01	40	MALE	WHO III	Oligodendroglioma	Codel	Mutant	Primary	0	916
TCGA-P5-A5EX-01	41	FEMALE	WHO III	Oligodendroglioma	Codel	Mutant	Primary	0	243
TCGA-E1-A7YI-01	33	FEMALE	WHO III	Astrocytoma	Codel	Mutant	Primary	1	111
TCGA-DB-A75K-01	55	FEMALE	WHO III	Oligoastrocytoma	Codel	Mutant	Primary	0	368
TCGA-P5-A730-01	22	MALE	WHO III	Oligoastrocytoma	Codel	Mutant	Primary	0	333
TCGA-DU-6394-01	53	MALE	WHO III	Oligodendroglioma	Codel	Mutant	Primary	1	682
TCGA-S9-A6WN-01	38	FEMALE	WHO III	Astrocytoma	Codel	Mutant	Primary	0	805
TCGA-QH-A6CU-01	52	FEMALE	WHO III	Oligodendroglioma	Codel	Mutant	Primary	0	451
TCGA-QH-A870-01	38	FEMALE	WHO III	Oligoastrocytoma	Non-codel	Mutant	Primary	0	395
TCGA-CS-4942-01	44	FEMALE	WHO III	Astrocytoma	Non-codel	Mutant	Primary	1	1335
TCGA-S9-A7QW-01	54	FEMALE	WHO III	Astrocytoma	Non-codel	Mutant	Primary	0	458
TCGA-DB-A4XE-01	27	FEMALE	WHO III	Oligoastrocytoma	Non-codel	Mutant	Primary	0	1139
TCGA-DB-A4XB-01	38	MALE	WHO III	Astrocytoma	Non-codel	Mutant	Primary	0	919
TCGA-HT-7479-01	44	MALE	WHO III	Astrocytoma	Non-codel	Mutant	Primary	0	1227
TCGA-DB-A4XD-01	32	MALE	WHO III	Astrocytoma	Non-codel	Mutant	Primary	0	1210
TCGA-HT-7688-01	59	MALE	WHO III	Oligodendroglioma	Non-codel	Mutant	Primary	0	964
TCGA-E1-5307-01	62	FEMALE	WHO III	Astrocytoma	Non-codel	Mutant	Primary	1	1762
TCGA-CS-5394-01	40	MALE	WHO III	Astrocytoma	Non-codel	Mutant	Primary	0	8
TCGA-DH-5143-01	30	MALE	WHO III	Oligoastrocytoma	Non-codel	Mutant	Primary	0	1401
TCGA-HT-7475-01	67	MALE	WHO III	Oligoastrocytoma	Non-codel	Mutant	Primary	0	530
TCGA-DU-A5TW-01	33	FEMALE	WHO III	Astrocytoma	Non-codel	Mutant	Primary	0	760
TCGA-DU-A6S7-01	27	FEMALE	WHO III	Astrocytoma	Non-codel	Mutant	Primary	0	638
TCGA-FN-7833-01	25	MALE	WHO III	Oligoastrocytoma	Non-codel	Mutant	Primary	0	837
TCGA-P5-A5F4-01	35	FEMALE	WHO III	Oligodendroglioma	Non-codel	Mutant	Primary	0	231
TCGA-S9-A6U6-01	28	MALE	WHO III	Astrocytoma	Non-codel	Mutant	Primary	0	1069
TCGA-DU-7309-01	41	FEMALE	WHO III	Oligodendroglioma	Non-codel	Mutant	Primary	0	84
TCGA-S9-A6U1-01	22	FEMALE	WHO III	Astrocytoma	Non-codel	Mutant	Primary	0	785
TCGA-DU-5851-01	40	FEMALE	WHO III	Oligoastrocytoma	Non-codel	Mutant	Primary	0	531
TCGA-DU-7298-01	38	FEMALE	WHO III	Astrocytoma	Non-codel	Mutant	Primary	1	576
TCGA-P5-A5EZ-01	39	MALE	WHO III	Astrocytoma	Non-codel	Mutant	Primary	0	70
TCGA-FG-7636-01	48	MALE	WHO III	Astrocytoma	Non-codel	Mutant	Primary	0	544
TCGA-S9-A6U9-01	36	MALE	WHO III	Astrocytoma	Non-codel	Mutant	Primary	0	2918
TCGA-HW-8319-01	34	FEMALE	WHO III	Astrocytoma	Non-codel	Mutant	Primary	1	1209
TCGA-CS-5393-01	39	MALE	WHO III	Astrocytoma	Non-codel	Mutant	Primary	0	1222
TCGA-HW-8320-01	36	MALE	WHO III	Astrocytoma	Non-codel	Mutant	Primary	0	1217
TCGA-E1-5304-01	42	MALE	WHO III	Astrocytoma	Non-codel	Mutant	Primary	1	1251
TCGA-DH-A7UV-01	49	MALE	WHO III	Astrocytoma	Non-codel	Mutant	Primary	0	566
TCGA-E1-5302-01	41	MALE	WHO III	Astrocytoma	Non-codel	Mutant	Primary	1	1525
TCGA-DU-8163-01	29	MALE	WHO III	Oligoastrocytoma	Non-codel	Mutant	Primary	0	629
TCGA-FG-8191-01	30	MALE	WHO III	Oligodendroglioma	Non-codel	Mutant	Primary	0	992
TCGA-HT-7470-01	37	MALE	WHO III	Oligodendroglioma	Non-codel	Mutant	Primary	1	1220
TCGA-HT-A5R7-01	33	FEMALE	WHO III	Astrocytoma	Non-codel	Mutant	Primary	0	615
TCGA-HT-7609-01	34	MALE	WHO III	Oligoastrocytoma	Non-codel	Mutant	Primary	0	1399
TCGA-S9-A7R8-01	44	FEMALE	WHO III	Astrocytoma	Non-codel	Mutant	Primary	1	961
TCGA-WY-A858-01	32	FEMALE	WHO III	Astrocytoma	Non-codel	Mutant	Primary	0	1337
TCGA-VV-A86M-01	36	FEMALE	WHO III	Astrocytoma	Non-codel	Mutant	Primary	0	487
TCGA-DU-7304-01	43	MALE	WHO III	Oligoastrocytoma	Non-codel	Mutant	Primary	1	709
TCGA-HT-7855-01	39	MALE	WHO III	Astrocytoma	Non-codel	Mutant	Primary	0	585
TCGA-HT-8114-01	36	MALE	WHO III	Oligoastrocytoma	Non-codel	Mutant	Primary	0	1040
TCGA-P5-A77W-01	37	FEMALE	WHO III	Oligoastrocytoma	Non-codel	Mutant	Primary	0	584
TCGA-HT-7879-01	31	MALE	WHO III	Oligoastrocytoma	Non-codel	Mutant	Primary	0	112
TCGA-TM-A84H-01	44	FEMALE	WHO III	Oligoastrocytoma	Non-codel	Mutant	Primary	0	926
TCGA-HW-8321-01	31	MALE	WHO III	Astrocytoma	Non-codel	Mutant	Primary	0	1294
TCGA-HT-8111-01	32	MALE	WHO III	Oligoastrocytoma	Non-codel	Mutant	Primary	0	7
TCGA-DU-6408-01	23	FEMALE	WHO III	Oligodendroglioma	Non-codel	Mutant	Primary	1	3470
TCGA-P5-A72X-01	21	MALE	WHO III	Astrocytoma	Non-codel	Mutant	Primary	0	403
TCGA-E1-5305-01	34	MALE	WHO III	Astrocytoma	Non-codel	Mutant	Primary	1	2433
TCGA-DH-A7UU-01	43	MALE	WHO III	Astrocytoma	Non-codel	Mutant	Primary	0	417
TCGA-DB-A64X-01	56	FEMALE	WHO III	Astrocytoma	Non-codel	Mutant	Primary	0	563
TCGA-S9-A6TS-01	48	FEMALE	WHO III	Astrocytoma	Non-codel	Mutant	Primary	1	1891
TCGA-DB-5270-01	38	FEMALE	WHO III	Oligoastrocytoma	Non-codel	Mutant	Primary	0	3733
TCGA-DU-7299-01	33	MALE	WHO III	Astrocytoma	Non-codel	Mutant	Primary	1	1339
TCGA-CS-6290-01	31	MALE	WHO III	Astrocytoma	Non-codel	Mutant	Primary	1	1137
TCGA-S9-A7QX-01	36	FEMALE	WHO III	Astrocytoma	Non-codel	Mutant	Primary	0	564
TCGA-FG-8185-01	37	MALE	WHO III	Astrocytoma	Non-codel	Mutant	Primary	0	433
TCGA-DB-5277-01	34	MALE	WHO III	Astrocytoma	Non-codel	Mutant	Primary	1	1547
TCGA-P5-A72W-01	35	MALE	WHO III	Astrocytoma	Non-codel	Mutant	Primary	0	317
TCGA-CS-6665-01	51	FEMALE	WHO III	Astrocytoma	Non-codel	Mutant	Primary	0	1568
TCGA-CS-4943-01	37	MALE	WHO III	Astrocytoma	Non-codel	Mutant	Primary	1	1106
TCGA-DB-5276-01	32	MALE	WHO III	Oligoastrocytoma	Non-codel	Mutant	Primary	0	2218
TCGA-DB-5275-01	36	MALE	WHO III	Oligoastrocytoma	Non-codel	Mutant	Primary	0	1458
TCGA-S9-A7IZ-01	48	FEMALE	WHO III	Astrocytoma	Non-codel	Mutant	Primary	0	608
TCGA-DB-A75L-01	36	FEMALE	WHO III	Astrocytoma	Non-codel	Mutant	Primary	0	342
TCGA-DU-6542-01	25	MALE	WHO III	Oligoastrocytoma	Non-codel	Mutant	Primary	0	73
TCGA-HT-7684-01	58	MALE	WHO III	Oligoastrocytoma	Non-codel	Mutant	Primary	0	184
TCGA-DB-A75O-01	29	MALE	WHO III	Astrocytoma	Non-codel	Mutant	Primary	0	935
TCGA-S9-A7R4-01	46	MALE	WHO III	Astrocytoma	Non-codel	Mutant	Primary	0	914
TCGA-CS-6666-01	22	MALE	WHO III	Astrocytoma	Non-codel	Mutant	Primary	0	1428
TCGA-HT-7477-01	62	MALE	WHO III	Astrocytoma	Non-codel	Mutant	Primary	0	738
TCGA-DU-5855-01	49	FEMALE	WHO III	Oligoastrocytoma	Non-codel	Mutant	Primary	0	207
TCGA-E1-5303-01	38	MALE	WHO III	Astrocytoma	Non-codel	Mutant	Primary	1	2052
TCGA-HT-A74K-01	58	FEMALE	WHO III	Oligodendroglioma	Non-codel	Mutant	Primary	0	467
TCGA-P5-A780-01	44	FEMALE	WHO III	Astrocytoma	Non-codel	Mutant	Primary	0	72
TCGA-TM-A84F-01	48	MALE	WHO III	Astrocytoma	Non-codel	Mutant	Primary	0	1796
TCGA-DB-A4XF-01	41	FEMALE	WHO III	Astrocytoma	Non-codel	Mutant	Primary	0	1021
TCGA-DU-A7T8-01	35	MALE	WHO III	Oligoastrocytoma	Non-codel	Mutant	Primary	1	4229
TCGA-HT-A618-01	37	FEMALE	WHO III	Astrocytoma	Non-codel	Mutant	Primary	0	512
TCGA-E1-A7YV-01	26	FEMALE	WHO III	Oligoastrocytoma	Non-codel	Mutant	Primary	1	987
TCGA-RY-A83Z-01	54	FEMALE	WHO III	Astrocytoma	Non-codel	Mutant	Primary	0	301
TCGA-DH-A7UT-01	30	MALE	WHO III	Astrocytoma	Non-codel	Mutant	Primary	1	531
TCGA-S9-A7IS-01	33	FEMALE	WHO III	Astrocytoma	Non-codel	Mutant	Primary	1	241
TCGA-HT-7686-01	29	FEMALE	WHO III	Astrocytoma	Non-codel	Mutant	Primary	0	1300
TCGA-DH-A66D-01	43	FEMALE	WHO III	Astrocytoma	Non-codel	Mutant	Primary	0	846
TCGA-HT-7690-01	29	MALE	WHO III	Oligoastrocytoma	Non-codel	Mutant	Primary	0	3
TCGA-FG-A87N-01	37	FEMALE	WHO III	Astrocytoma	Non-codel	Mutant	Primary	0	567
TCGA-DU-7010-01	58	FEMALE	WHO III	Astrocytoma	Non-codel	Mutant	Primary	1	456
TCGA-S9-A6WG-01	31	MALE	WHO III	Astrocytoma	Non-codel	Mutant	Primary	0	2602
TCGA-DU-6396-01	31	FEMALE	WHO III	Oligoastrocytoma	Non-codel	Mutant	Primary	1	2286
TCGA-DB-5281-01	61	MALE	WHO III	Oligoastrocytoma	Non-codel	Mutant	Primary	0	2381
TCGA-DB-5273-01	33	MALE	WHO III	Astrocytoma	Non-codel	Mutant	Primary	0	2493
TCGA-HT-8106-01	53	MALE	WHO III	Astrocytoma	Non-codel	Mutant	Primary	0	3
TCGA-E1-A7YJ-01	55	MALE	WHO III	Astrocytoma	Non-codel	Mutant	Primary	1	592
TCGA-DH-5142-01	29	MALE	WHO III	Astrocytoma	Non-codel	Mutant	Primary	0	1943
TCGA-HT-A74O-01	34	MALE	WHO III	Astrocytoma	Non-codel	Mutant	Primary	0	3
TCGA-DH-A66G-01	49	FEMALE	WHO III	Oligodendroglioma	Non-codel	Mutant	Primary	0	523
TCGA-HT-7601-01	30	FEMALE	WHO III	Astrocytoma	Non-codel	Mutant	Primary	0	153
TCGA-DU-7304-02	43	MALE	WHO III	Oligoastrocytoma	Non-codel	Mutant	Recurrent	1	709
TCGA-E1-A7YE-01	32	FEMALE	WHO III	Astrocytoma	Non-codel	Mutant	Primary	1	886
TCGA-HT-8563-01	30	FEMALE	WHO III	Astrocytoma	Non-codel	Mutant	Primary	0	860
TCGA-HT-A61B-01	22	MALE	WHO III	Astrocytoma	Non-codel	Mutant	Primary	0	533
TCGA-S9-A7J0-01	30	FEMALE	WHO III	Oligodendroglioma	Non-codel	Mutant	Primary	0	609
TCGA-DH-A66B-01	52	MALE	WHO III	Astrocytoma	Non-codel	Mutant	Primary	0	1279
TCGA-E1-A7YK-01	52	MALE	WHO III	Astrocytoma	Non-codel	Mutant	Primary	1	378
TCGA-S9-A89Z-01	40	MALE	WHO III	Astrocytoma	Non-codel	Mutant	Primary	0	623
TCGA-S9-A6TV-01	50	MALE	WHO III	Oligoastrocytoma	Non-codel	Mutant	Primary	0	571
TCGA-DU-A5TP-01	33	MALE	WHO III	Astrocytoma	Non-codel	Mutant	Primary	0	1012
TCGA-TM-A84I-01	30	MALE	WHO III	Astrocytoma	Non-codel	Mutant	Primary	0	854
TCGA-FG-A6J3-01	52	FEMALE	WHO III	Astrocytoma	Non-codel	Mutant	Primary	0	677
TCGA-P5-A5EU-01	35	MALE	WHO III	Astrocytoma	Non-codel	Mutant	Primary	0	0
TCGA-QH-A6CW-01	43	MALE	WHO III	Oligoastrocytoma	NA	NA	Primary	0	414
TCGA-QH-A6CS-01	41	MALE	WHO III	Astrocytoma	Non-codel	Wildtype	Primary	0	588
TCGA-E1-A7YS-01	71	MALE	WHO III	Oligodendroglioma	Non-codel	Wildtype	Primary	1	466
TCGA-RY-A840-01	47	MALE	WHO III	Oligodendroglioma	Non-codel	Wildtype	Primary	0	854
TCGA-S9-A7R2-01	69	MALE	WHO III	Astrocytoma	Non-codel	Wildtype	Primary	1	316
TCGA-P5-A781-01	34	FEMALE	WHO III	Astrocytoma	Non-codel	Wildtype	Primary	0	134
TCGA-HT-7860-01	60	FEMALE	WHO III	Astrocytoma	Non-codel	Wildtype	Primary	0	15
TCGA-HT-A74H-01	62	MALE	WHO III	Astrocytoma	Non-codel	Wildtype	Primary	0	74
TCGA-CS-6186-01	58	MALE	WHO III	Oligoastrocytoma	Non-codel	Wildtype	Primary	1	538
TCGA-E1-A7YM-01	63	MALE	WHO III	Astrocytoma	Non-codel	Wildtype	Primary	1	648
TCGA-DU-8161-01	63	FEMALE	WHO III	Oligoastrocytoma	Non-codel	Wildtype	Primary	1	722
TCGA-HT-8110-01	57	MALE	WHO III	Astrocytoma	Non-codel	Wildtype	Primary	0	419
TCGA-HT-7469-01	30	MALE	WHO III	Oligodendroglioma	Non-codel	Wildtype	Primary	1	351
TCGA-DU-8162-01	61	FEMALE	WHO III	Oligoastrocytoma	Non-codel	Wildtype	Primary	1	444
TCGA-DU-7290-01	45	FEMALE	WHO III	Astrocytoma	Non-codel	Wildtype	Primary	1	315
TCGA-TM-A84B-01	40	MALE	WHO III	Astrocytoma	Non-codel	Wildtype	Primary	1	758
TCGA-TQ-A7RM-01	41	FEMALE	WHO III	Oligoastrocytoma	Non-codel	Wildtype	Primary	0	1116
TCGA-HT-8019-01	34	FEMALE	WHO III	Oligodendroglioma	Non-codel	Wildtype	Primary	0	1004
TCGA-DU-6403-01	60	FEMALE	WHO III	Oligoastrocytoma	Non-codel	Wildtype	Primary	1	354
TCGA-FG-6688-01	59	FEMALE	WHO III	Astrocytoma	Non-codel	Wildtype	Primary	0	571
TCGA-DU-8158-01	57	FEMALE	WHO III	Astrocytoma	Non-codel	Wildtype	Primary	1	155
TCGA-FG-8181-01	23	MALE	WHO III	Oligoastrocytoma	Non-codel	Wildtype	Primary	0	862
TCGA-CS-5397-01	54	FEMALE	WHO III	Astrocytoma	Non-codel	Wildtype	Primary	1	194
TCGA-S9-A89V-01	70	MALE	WHO III	Astrocytoma	Non-codel	Wildtype	Primary	0	569
TCGA-DU-7292-01	69	MALE	WHO III	Astrocytoma	Non-codel	Wildtype	Primary	1	242
TCGA-S9-A6WM-01	59	FEMALE	WHO III	Astrocytoma	Non-codel	Wildtype	Primary	0	604
TCGA-TM-A7C3-01	43	FEMALE	WHO III	Astrocytoma	Non-codel	Wildtype	Primary	1	1666
TCGA-P5-A72U-01	71	FEMALE	WHO III	Oligodendroglioma	Non-codel	Wildtype	Primary	0	7
TCGA-DU-5854-01	57	FEMALE	WHO III	Astrocytoma	Non-codel	Wildtype	Primary	0	257
TCGA-P5-A736-01	44	FEMALE	WHO III	Astrocytoma	Non-codel	Wildtype	Primary	0	230
TCGA-DU-A5TT-01	70	MALE	WHO III	Oligodendroglioma	Non-codel	Wildtype	Primary	0	743
TCGA-CS-4941-01	67	MALE	WHO III	Astrocytoma	Non-codel	Wildtype	Primary	1	234
TCGA-QH-A6CV-01	51	MALE	WHO III	Oligoastrocytoma	Non-codel	Wildtype	Primary	0	442
TCGA-VW-A8FI-01	66	MALE	WHO III	Astrocytoma	Non-codel	Wildtype	Primary	1	245
TCGA-DU-7012-01	74	FEMALE	WHO III	Astrocytoma	Non-codel	Wildtype	Primary	1	199
TCGA-VM-A8CD-01	58	MALE	WHO III	Astrocytoma	Non-codel	Wildtype	Primary	1	240
TCGA-HW-A5KK-01	64	MALE	WHO III	Astrocytoma	Non-codel	Wildtype	Primary	1	388
TCGA-DU-6402-01	52	MALE	WHO III	Astrocytoma	Non-codel	Wildtype	Primary	1	214
TCGA-FG-5963-01	23	MALE	WHO III	Astrocytoma	Non-codel	Wildtype	Primary	1	775
TCGA-FG-A87Q-01	61	FEMALE	WHO III	Astrocytoma	Non-codel	Wildtype	Primary	0	174
TCGA-DH-5140-01	38	FEMALE	WHO III	Oligoastrocytoma	Non-codel	Wildtype	Primary	1	607
TCGA-FG-A4MW-01	63	MALE	WHO III	Oligoastrocytoma	Non-codel	Wildtype	Primary	1	559
TCGA-HT-A5RC-01	70	FEMALE	WHO III	Astrocytoma	Non-codel	Wildtype	Primary	1	162
TCGA-HT-8104-01	51	FEMALE	WHO III	Astrocytoma	Non-codel	Wildtype	Primary	0	372
TCGA-HT-8011-01	55	MALE	WHO III	Astrocytoma	Non-codel	Wildtype	Primary	0	494
TCGA-HT-A5RA-01	65	FEMALE	WHO III	Astrocytoma	Non-codel	Wildtype	Primary	0	832
TCGA-DU-6405-01	51	FEMALE	WHO III	Astrocytoma	Non-codel	Wildtype	Primary	1	605
TCGA-HT-8564-01	47	MALE	WHO III	Astrocytoma	Non-codel	Wildtype	Primary	0	478
TCGA-E1-A7YN-01	63	FEMALE	WHO III	Astrocytoma	Non-codel	Wildtype	Primary	1	727
TCGA-DU-A5TY-01	46	FEMALE	WHO III	Astrocytoma	Non-codel	Wildtype	Primary	1	1033
TCGA-DU-6392-01	35	FEMALE	WHO III	Astrocytoma	Non-codel	Wildtype	Primary	0	6423
TCGA-DU-5852-01	61	FEMALE	WHO III	Oligoastrocytoma	Non-codel	Wildtype	Primary	1	205
TCGA-FG-6692-01	63	MALE	WHO III	Oligodendroglioma	Non-codel	Wildtype	Primary	1	561
TCGA-E1-A7YU-01	42	MALE	WHO III	Oligoastrocytoma	Non-codel	Wildtype	Primary	1	23
TCGA-QH-A6XC-01	48	MALE	WHO III	Astrocytoma	Non-codel	Wildtype	Primary	0	508
TCGA-S9-A7IX-01	57	MALE	WHO III	Astrocytoma	Non-codel	Wildtype	Primary	1	819
TCGA-FG-A70Z-01	53	FEMALE	WHO III	Oligoastrocytoma	Non-codel	Wildtype	Primary	0	328
TCGA-KT-A7W1-01	45	FEMALE	WHO III	Astrocytoma	Non-codel	Wildtype	Primary	0	438
TCGA-CS-6188-01	48	MALE	WHO III	Astrocytoma	Non-codel	Wildtype	Primary	1	814
TCGA-DU-A7TJ-01	55	MALE	WHO III	Astrocytoma	Non-codel	Wildtype	Primary	0	17
TCGA-TM-A84J-01	63	MALE	WHO III	Oligodendroglioma	Non-codel	Wildtype	Primary	0	735
TCGA-DU-8165-01	60	FEMALE	WHO III	Oligodendroglioma	Non-codel	Wildtype	Primary	0	582
TCGA-DU-7006-01	60	FEMALE	WHO III	Astrocytoma	Non-codel	Wildtype	Primary	1	349
TCGA-DU-7013-01	59	MALE	WHO III	Astrocytoma	Non-codel	Wildtype	Primary	1	269
TCGA-DU-6406-01	59	FEMALE	WHO III	Oligoastrocytoma	Non-codel	Wildtype	Primary	1	512
TCGA-S9-A6U0-01	46	MALE	WHO III	Astrocytoma	Non-codel	Wildtype	Primary	1	742
TCGA-HT-A4DS-01	55	FEMALE	WHO III	Astrocytoma	Non-codel	Wildtype	Primary	0	7
TCGA-DU-6404-01	24	FEMALE	WHO III	Oligodendroglioma	Non-codel	Wildtype	Primary	1	4068
TCGA-HT-7857-01	24	FEMALE	WHO III	Astrocytoma	Non-codel	Wildtype	Primary	0	7
TCGA-E1-A7YL-01	46	MALE	WHO III	Astrocytoma	Non-codel	Wildtype	Primary	1	492
TCGA-DU-5847-01	34	FEMALE	WHO III	Astrocytoma	Non-codel	Wildtype	Primary	0	548
TCGA-HT-A61C-01	66	MALE	WHO III	Oligodendroglioma	Non-codel	Wildtype	Primary	1	537
TCGA-DU-A7TD-01	52	MALE	WHO III	Oligoastrocytoma	Non-codel	Wildtype	Primary	1	228
TCGA-FG-5963-02	23	MALE	WHO III	Astrocytoma	Non-codel	Wildtype	Recurrent	1	775
TCGA-DU-6404-02	24	FEMALE	WHO III	Oligodendroglioma	Non-codel	Wildtype	Recurrent	1	4068
TCGA-HT-7882-01	66	MALE	WHO III	Oligodendroglioma	Non-codel	Wildtype	Primary	1	113
TCGA-DU-A76L-01	54	MALE	WHO III	Oligodendroglioma	Non-codel	Wildtype	Primary	1	814
TCGA-S9-A6UA-01	66	MALE	WHO III	Astrocytoma	Non-codel	Wildtype	Primary	1	178
TCGA-FG-A4MU-01	58	MALE	WHO III	Oligoastrocytoma	Non-codel	Wildtype	Primary	0	326
